# Supplementary material
Source: bioRxiv or medRxiv preprint supplement (https://www.biorxiv.org/highwire/filestream/102105/field_highwire_adjunct_files/0/333658-1.pdf)
Supplement: Supplementary file [file 333658-1.pdf]

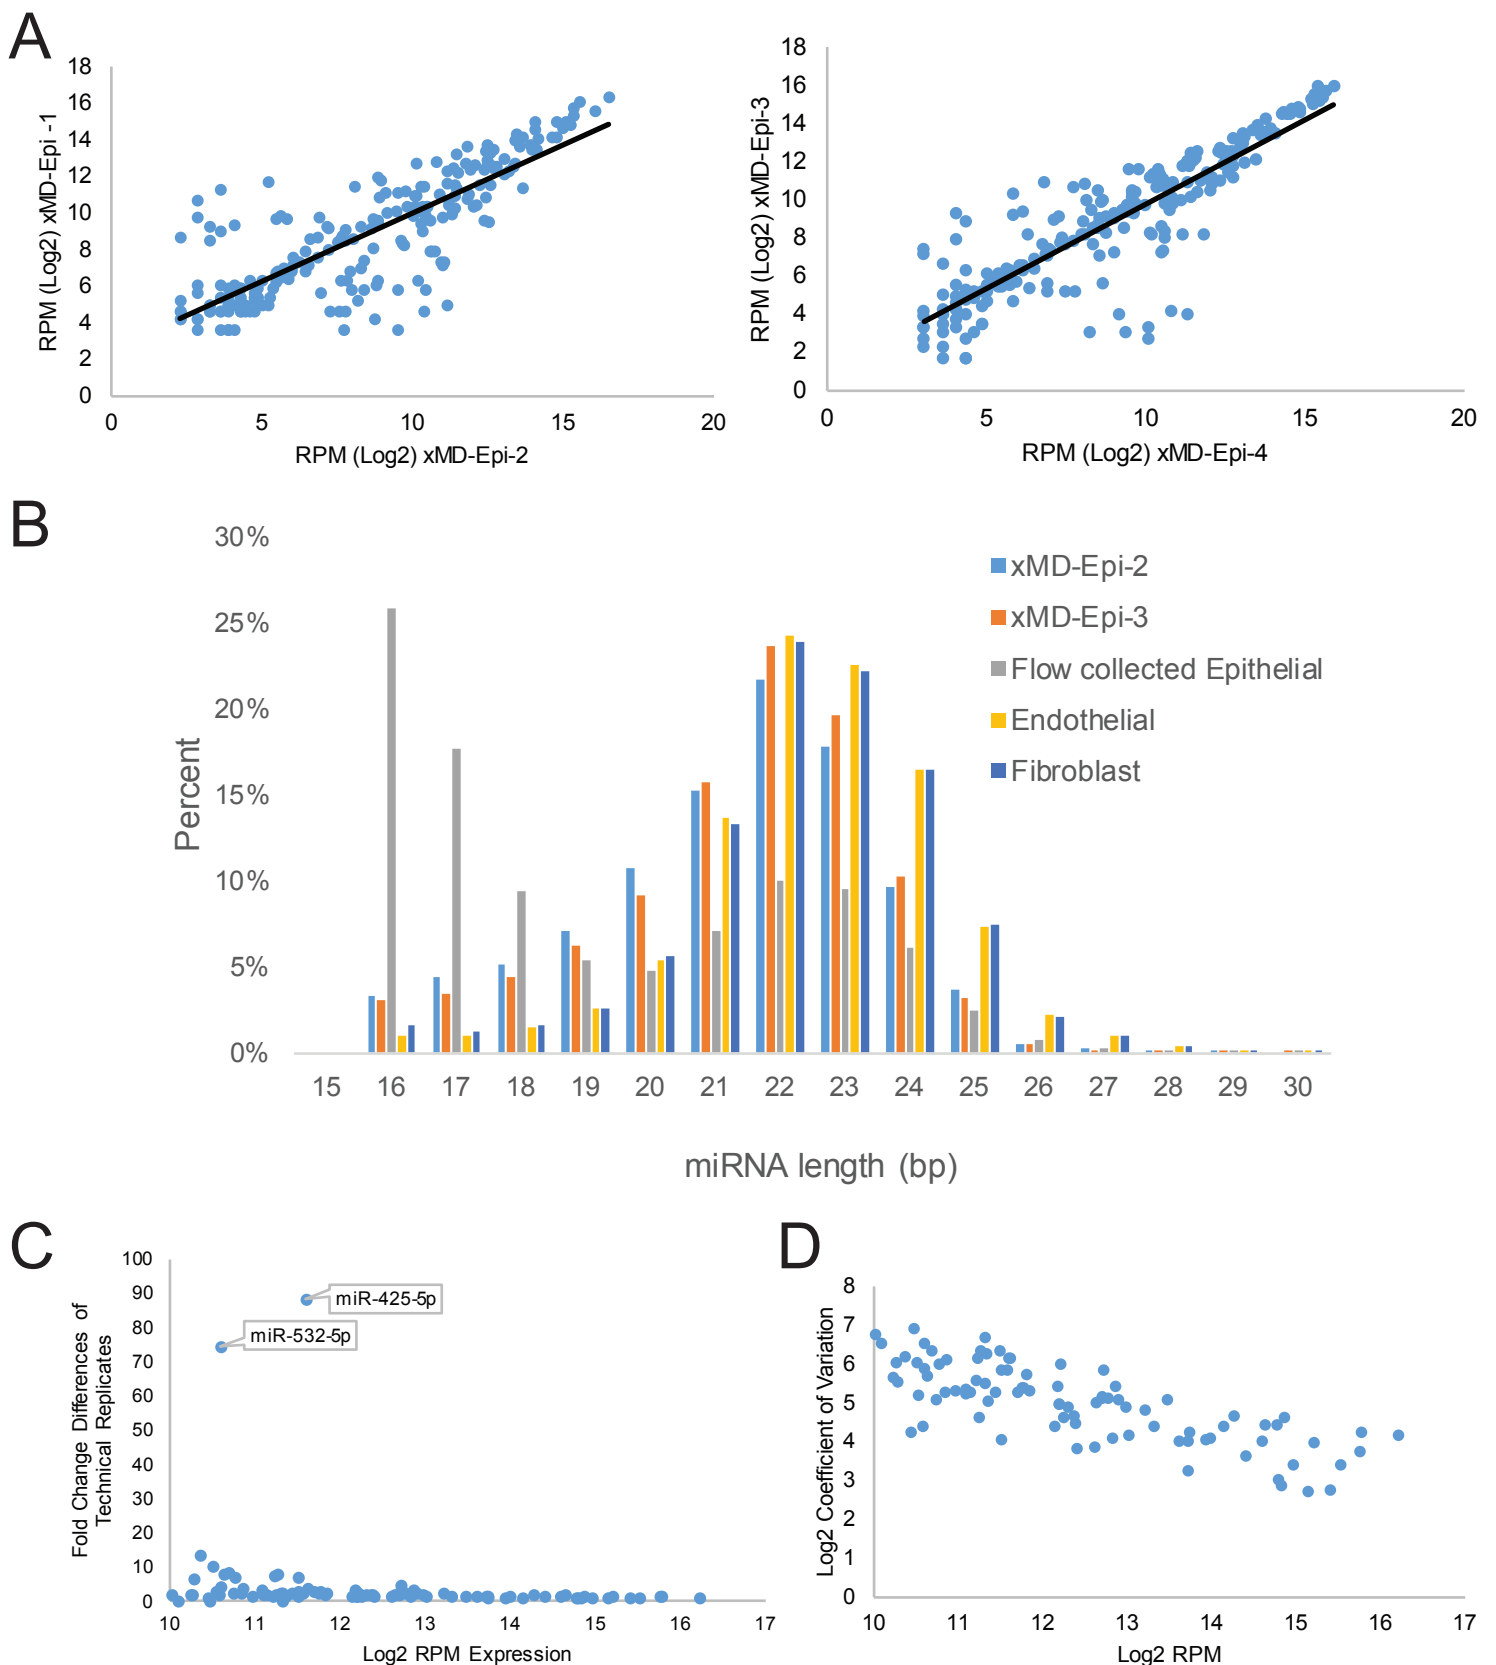

**Supplemental Figure 1.** A) Pairwise scatter plots of technical replicates of xMD-Epi-1 vs 2 and xMD-Epi-3 vs 4. B) Relative length (in bp) of miRNAs and their isomiRs for 5 samples. The xMD-derived samples are more equivalent to cell culture cell distributions than to the flow collected epithelial cells, which are enriched for shorter sequences. C) A plot of fold change differences between technical replicates of xMD-Epi samples vs average log<sub>2</sub> RPM expression showing larger variability occurring with more lowly expressed miRNAs. Two extreme outliers were noted. D) Plot of the coefficient of variation versus log<sub>2</sub> RPM expression showing similar overall variation across these 90 miRNA samples.

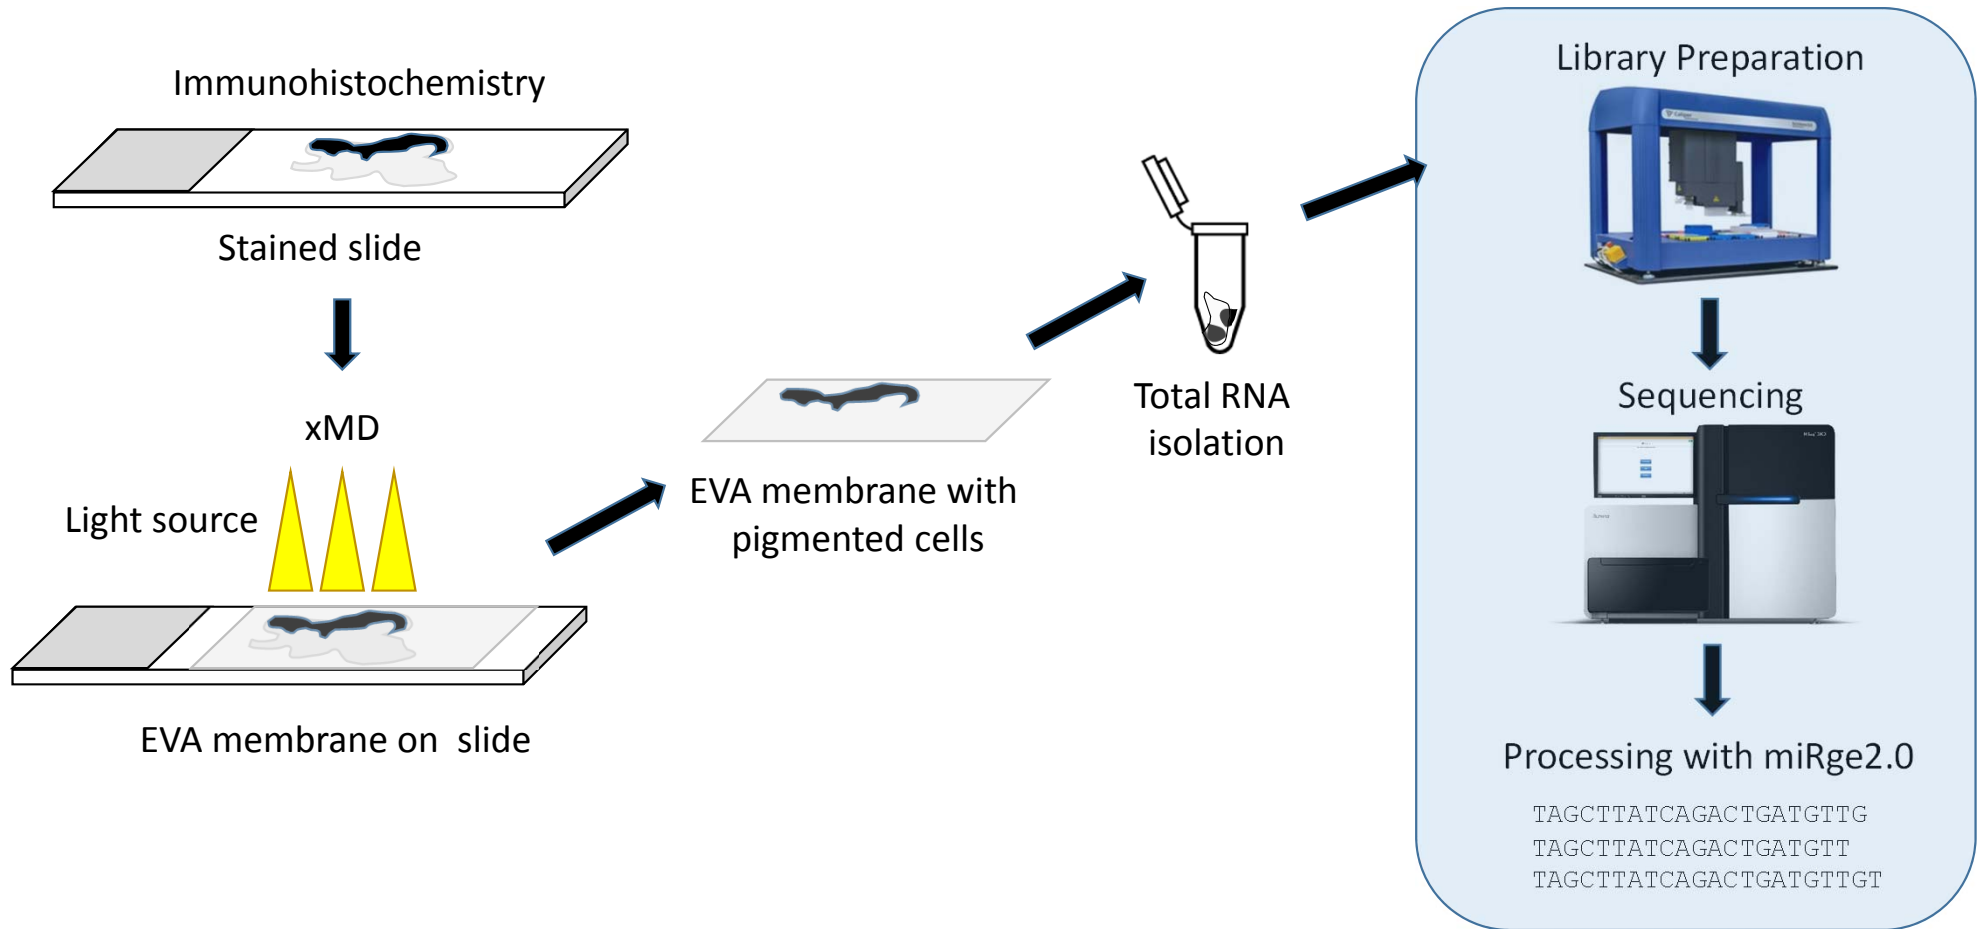

**Supplemental Figure 2. The general workflow of xMD-miRNA-seq.** Slides are stained through standard immunohistochemistry using RNA precautions. xMD is performed to transfer pigmented cells from the slide to the EVA membrane. The EVA membrane is placed in a tube and the cell material including RNA is eluted. Then a standard sequencing library preparation, run on a high-throughput sequencer and processing of FASTQ files is performed (blue box).
